# Supplementary material for: Weekly Folic Acid Is a Convenient and Well-Tolerated Alternative to Daily Dosing in Pediatric Patients with Inflammatory Bowel Disease on Methotrexate
Source: MDPI journal article supplement (doi:10.3390/nu15071586), 2023-03-24

Supplementary Materials:

Figure S1: Pre- and post- study levels of **(a)** hematocrit, **(b)** mean corpuscular volume, **(c)** erythrocyte sedimentation rate, **(d)** alanine aminotransferase.

**(a)**

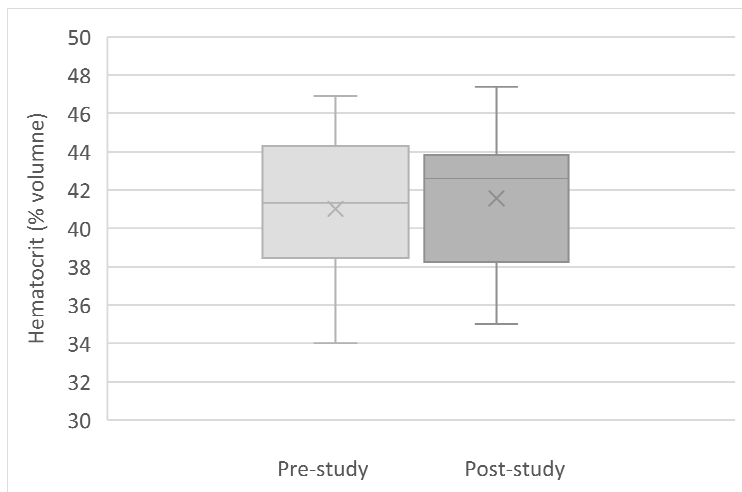

**(b)**

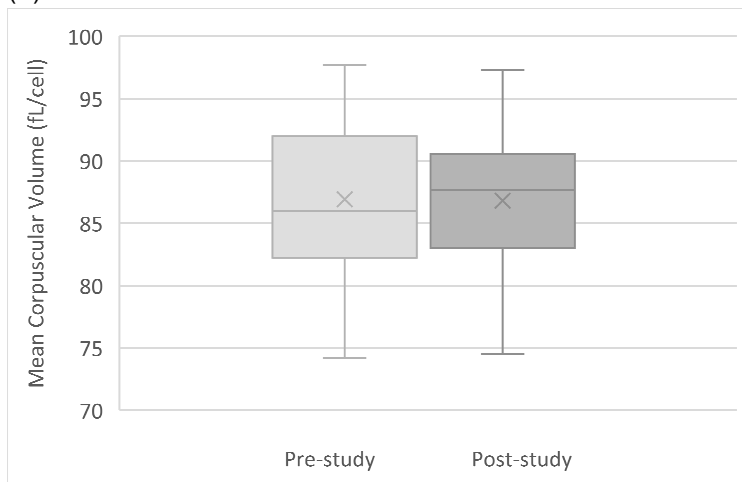

(c)

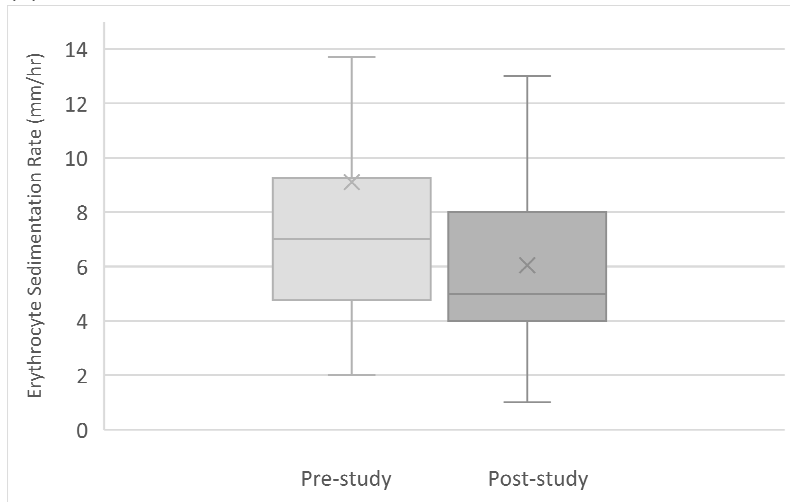

(d)

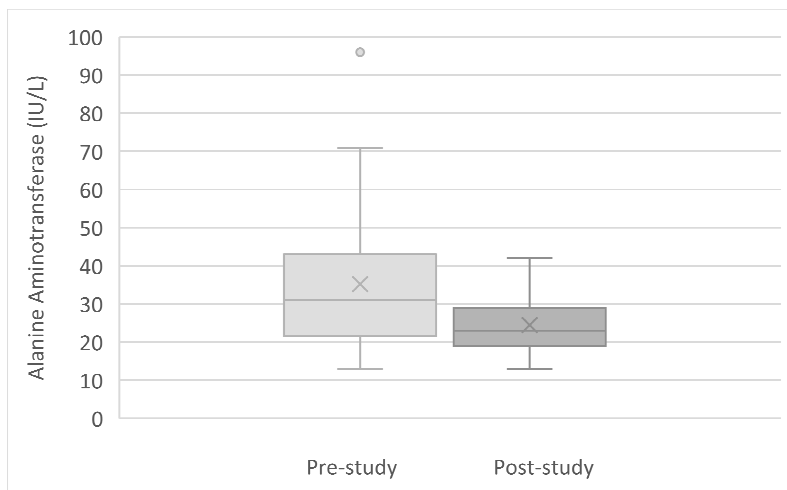

Supplement: s1 [file s1]
